WINTER 2020 | VOLUME 18 | NUMBER 1

# Focus

The Journal of Lifelong Learning in Psychiatry

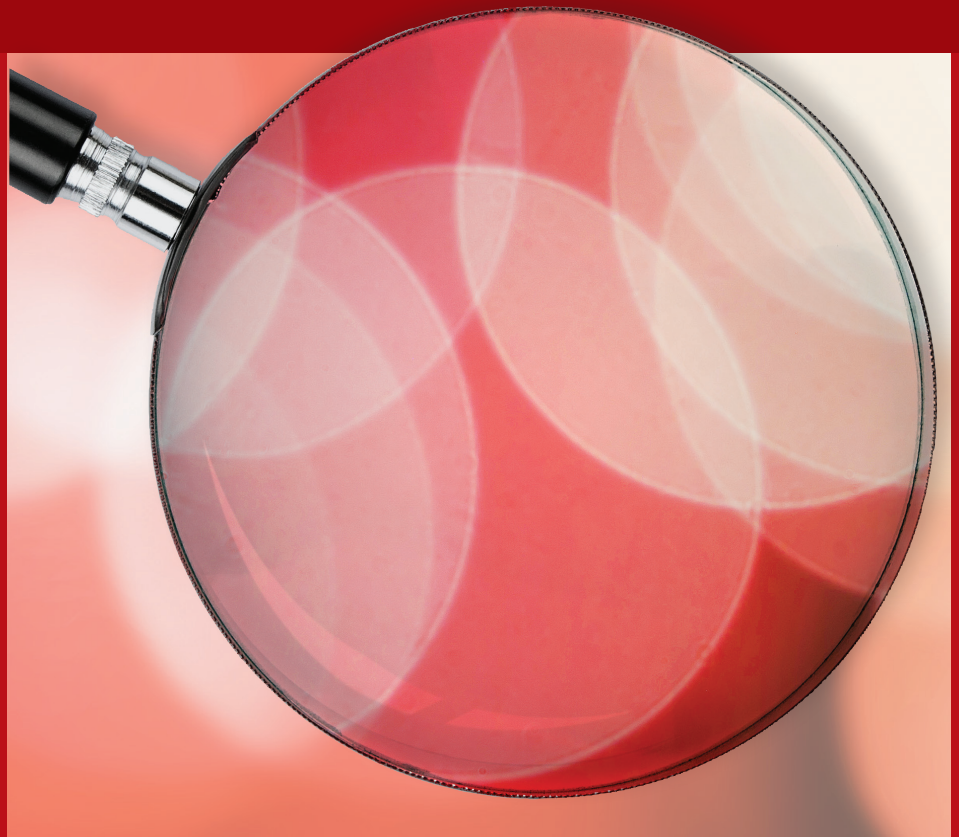

## Diversity, Equity, and Inclusion in Psychiatry

Guest Editor: Francisco Moreno, M.D.

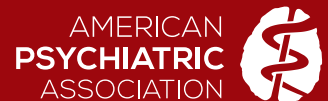

[focus.psychiatryonline.org](http://focus.psychiatryonline.org)
